# Supplementary material for: Sonochemistry-enabled uniform coupling of SnO2 nanocrystals with graphene sheets as anode materials for lithium-ion batteries
Source: Royal Society of Chemistry journal article supplement (doi:10.1039/c9ra00554d), 2019-01-01
Supplement: c9ra00554d1.pdf [file c9ra00554d1.pdf]

## Electronic Supplementary Information

### **Sonochemistry-enabled uniform coupling of SnO<sub>2</sub> nanocrystals with graphene sheets as anode materials for lithium-ion batteries**

Xiaoyan Han,<sup>a</sup> Ran Li,<sup>b</sup> Shengqiang Qiu,<sup>b</sup> Xiaofang Zhang,<sup>a</sup> Qing Zhang\*<sup>a, c</sup> and Yingkui Yang<sup>a, b, c</sup>

<sup>a</sup> Key Laboratory of Resources Green Conversion and Utilization of State Ethnic Affairs Commission & Ministry of Education, South-Central University for Nationalities, Wuhan 430074, China. Email: qingzhang@mail.scuec.edu.cn

<sup>b</sup> School of Materials Science and Engineering, Hubei University, Wuhan 430062, China

<sup>c</sup> Hubei Engineering Technology Research Centre for Energy Polymer Materials, School of Chemistry and Materials Science, South-Central University for Nationalities, Wuhan 430074, China

**Table S1** The comparison of various SnO<sub>2</sub>-based composites.

| <b>Electrode description</b>                                                       | <b>Synthesize method</b>                                         | <b>Reversible capacity</b>                          | <b>Rate capability</b>                              | <b>Cycling stability</b>                                            | <b>Ref.</b>      |
|------------------------------------------------------------------------------------|------------------------------------------------------------------|-----------------------------------------------------|-----------------------------------------------------|---------------------------------------------------------------------|------------------|
| SnO <sub>2</sub> /RGO (30 wt.%)                                                    | Sonochemical method                                              | 650 mAh g <sup>-1</sup> at 100 mA g <sup>-1</sup>   | 273 mAh g <sup>-1</sup> at 500 mA g <sup>-1</sup>   | 87% after 100 cycles (100 mA g <sup>-1</sup> )                      | <b>This work</b> |
| SnO <sub>2</sub> /RGO (40 wt.%)                                                    | Microwave-assisted method                                        | 350 mAh g <sup>-1</sup> at 300 mA g <sup>-1</sup>   | 300 mAh g <sup>-1</sup> at 500 mA g <sup>-1</sup>   | 62 mAh g <sup>-1</sup> after 50 cycles (100 mA g <sup>-1</sup> )    | [1]              |
| SnO <sub>2</sub> /graphene wrapped carbon nanotubes (74 wt.%)                      | Solar reduction technique                                        | 497 mAh g <sup>-1</sup> at 100 mA g <sup>-1</sup>   | 161 mAh g <sup>-1</sup> at 500 mA g <sup>-1</sup>   | 84% mAh g <sup>-1</sup> after 100 cycles (50 mA g <sup>-1</sup> )   | [2]              |
| SnO <sub>x</sub> /N-doped Carbon (55.6 wt.%)                                       | Sacrificial template method with ethanol steam reforming process | 651 mAh g <sup>-1</sup> at 100 mA g <sup>-1</sup>   | 231 mAh g <sup>-1</sup> at 600 mA g <sup>-1</sup>   | 435 mAh g <sup>-1</sup> after 500 cycles (1000 mA g <sup>-1</sup> ) | [3]              |
| SnO <sub>2</sub> /graphene (26 wt. %)                                              | Solution-based process                                           | 690 mAh g <sup>-1</sup> at 100 mA g <sup>-1</sup>   | ---                                                 | 63% after 20 cycles (100 mA g <sup>-1</sup> )                       | [4]              |
| rGO/SnO <sub>2</sub> @CF                                                           | Self-assembly approach                                           | 400 mAh g <sup>-1</sup> at 100 mA g <sup>-1</sup>   | 305 mAh g <sup>-1</sup> at 500 mA g <sup>-1</sup>   | 78% after 100 cycles (100 mA g <sup>-1</sup> )                      | [5]              |
| Graphene-wrapped SnO <sub>2</sub> nanotubes (SnO <sub>2</sub> -NTs/G) (20.6 wt. %) | Sn-nanorod-templated self-assembly route                         | 718.2 mAh g <sup>-1</sup> at 100 mA g <sup>-1</sup> | 379.8 mAh g <sup>-1</sup> at 500 mA g <sup>-1</sup> | 52% after 200 cycles (100 mA g <sup>-1</sup> )                      | [6]              |

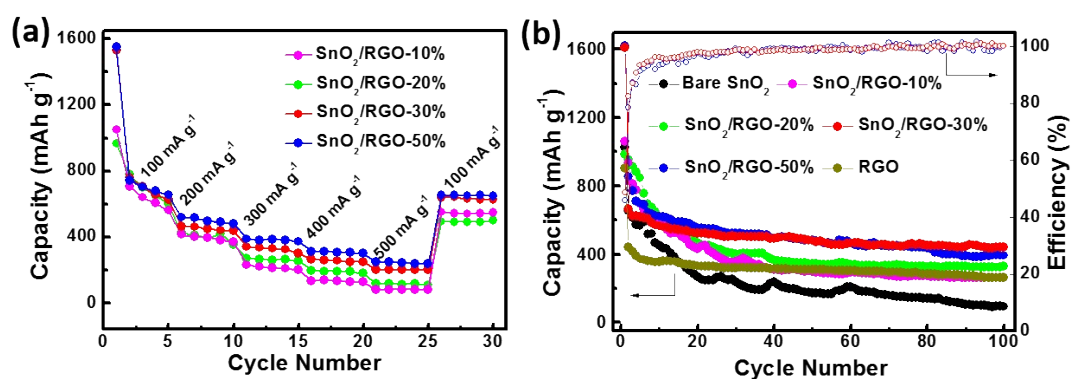

**Fig. S1** (a) Rate performance, (b) cycling performance and coulombic efficiency at 100 mA g<sup>-1</sup> of SnO<sub>2</sub>/graphene nanocomposites with different GO content.

### References

1. T. Q. Chen, L. K. Pan, X. J. Liu, K. Yu and Z. Sun, *RSC Adv.*, 2012, **2**, 11719.
2. M. Sahoo and S. Ramaprabhu, *RSC Adv.*, 2017, **7**, 13789.
3. C. Zhu, D. H. Wei, Y. L. Wu, Z. Zhang, G. H. Zhang, J. F. Duan, L. J. Li, H. L. Zhu, Z. Y. Zhu and Z. Y. Chen, *J. Alloys Compd.*, 2019, **778**, 731.
4. J. F. Liang, W. Wei, D. Zhong, Q. L. Yang, L. D. Li and L. Guo, *ACS Appl. Mater. Interfaces*, 2012, **4**, 454.
5. H. G. Li, S. B. Wang, M. J. Feng, J. P. Yang and B. M. Zhang, *J Mater Sci.*, 2018, **53**, 11607.
6. P. Wu, X. L. Xu, Q. Y. Zhu, X. S. Zhu, Y. W. Tang, Y. M. Zhou and T. H. Lu, *J. Alloys Compd.*, 2015, **626**, 234.
